# Supplementary material for: Multi-site coordination N-phosphanylamidine ligands as stabilizers for the synthesis of ruthenium nanoparticles
Source: Royal Society of Chemistry journal article supplement (doi:10.1039/c1nj20465c), 2011-01-01
Supplement: c1nj20465c.pdf [file c1nj20465c.pdf]

## Supporting Information

### Multi-site coordination *N*-phosphanylamidine ligands as stabilizers for the synthesis of ruthenium nanoparticles

Raymond Bronger, Thanh Dung Le, Stéphanie Bastin, Jordi García-Antón, Cécilia Citadelle, Bruno Chaudret, Pierre Lecante, Alain Igau\* and Karine Philippot\*

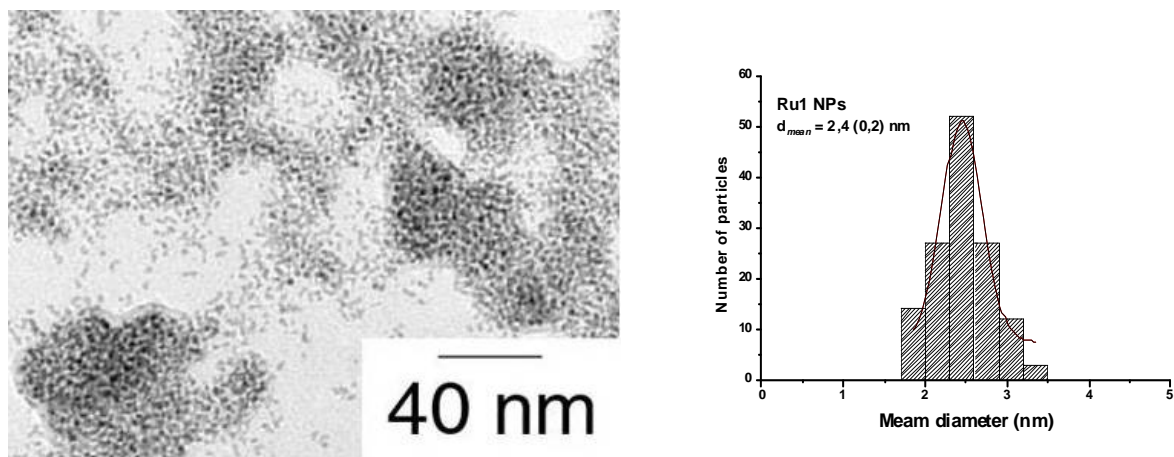

Figure S1. TEM image of *N*-phosphanylamidine-stabilized ruthenium nanoparticles **Ru1** and the corresponding particle size distribution

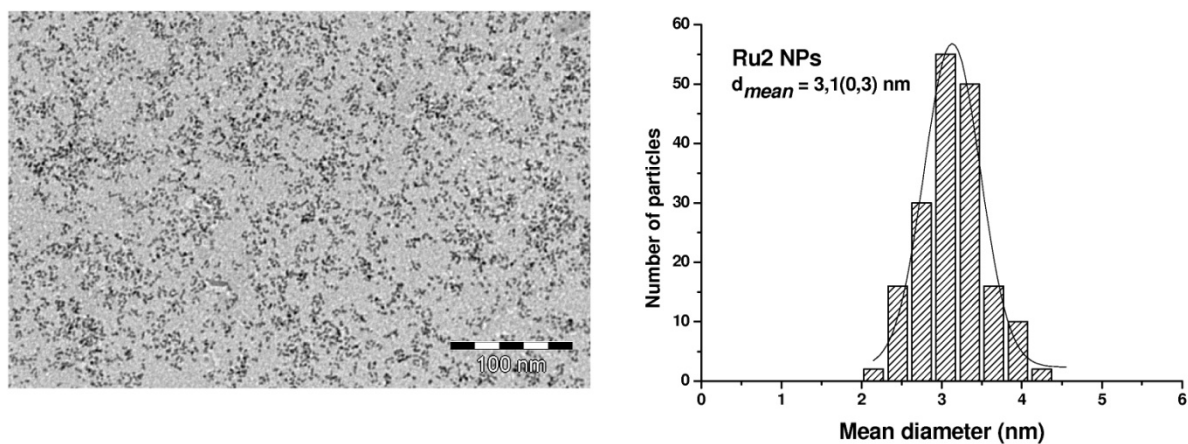

Figure S2. TEM image of *N*-phosphanylamidine-stabilized ruthenium nanoparticles **Ru2** and the corresponding particle size distribution.

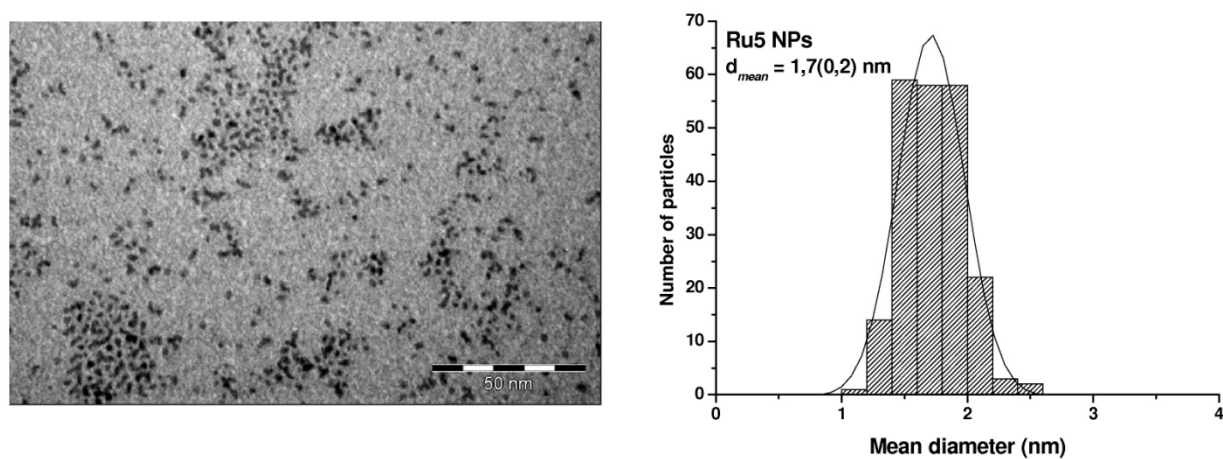

Figure S3. TEM image of *N*-phosphanylamidine-stabilized ruthenium nanoparticles **Ru5** and the corresponding particle size distribution.
